# Supplementary material for: Colorimetric sensing strategy for mercury(ii) and melamine utilizing cysteamine-modified gold nanoparticles
Source: Royal Society of Chemistry journal article supplement (doi:10.1039/c3an00690e), 2013-01-01
Supplement: c3an00690e.pdf [file c3an00690e.pdf]

# Supporting Information

## Colorimetric Sensing Strategy for Mercury (II) and Melamine Utilizing Cysteamine-modified Gold Nanoparticles

*Yujie Ma<sup>a</sup>, Ling Jiang<sup>b</sup>, Yajun Mei<sup>a</sup>, Rongbin Song<sup>a</sup>, Danbi Tian<sup>a\*</sup> and He Huang<sup>b</sup>*

<sup>a</sup>College of Science, Nanjing University of Technology, Puzhu Road, Nanjing 211816,  
People's Republic of China.

<sup>b</sup>College of Biotechnology and Pharmaceutical Engineering; State Key Laboratory of  
Materials-Oriented Chemical Engineering, College of Food Science and Light  
Industry, Nanjing University of Technology, Nanjing 210009, People's Republic of  
China.

\*E-mail: danbi@njut.edu.cn. Phone: (+86)-(025)-83172094.

## **-Table of Contents-**

|                                                                                                                                                |           |
|------------------------------------------------------------------------------------------------------------------------------------------------|-----------|
| <b>Figure S1. UV-vis spectra ratio of E650/E520 for the stoichiometric ratio of AuNPs to cysteamine</b>                                        | <b>S3</b> |
| <b>Figure S2. The pH effect to the CA-Au NPs</b>                                                                                               | <b>S3</b> |
| <b>Figure S3. UV-vis spectra ratio of E650/E520 in the presence of cytosine, uracil, thymine, lactose, urea, Ca<sup>2+</sup> and melamine.</b> | <b>S4</b> |
| <b>Table S1 Results of the Determination of the Hg<sup>2+</sup> in Tap Water</b>                                                               | <b>S4</b> |
| <b>Table S2 Results of the Determination of the Melamine in Milk Powder</b>                                                                    | <b>S5</b> |
| <b>Reference</b>                                                                                                                               | <b>S5</b> |

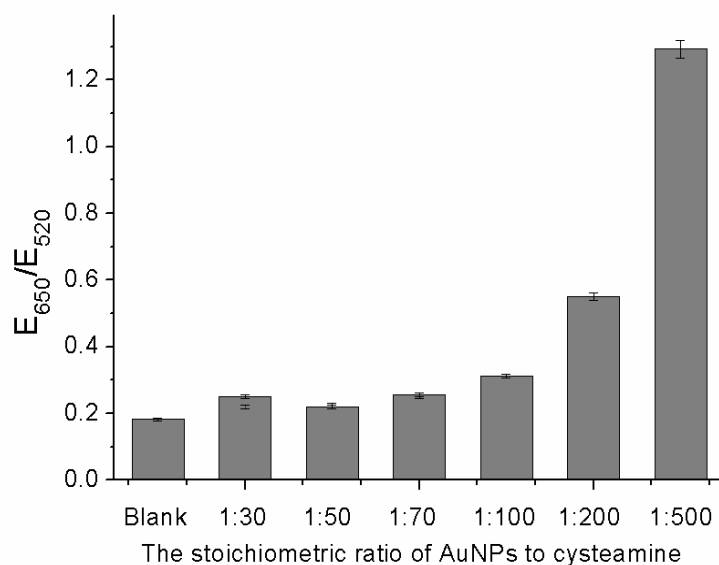

**Figure S1. UV-vis spectra ratio of E650/E520 for the stoichiometric ratio of AuNPs to cysteamine**

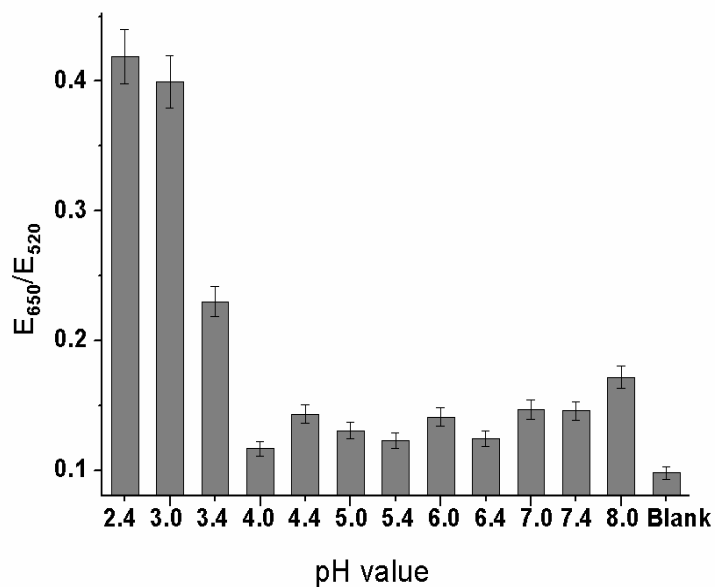

**Figure S2. The pH effect to the CA-Au NPs**

We evaluated the effects of solution pH change (ranging from 2.4 to 8) with 2 mM disodium hydrogen phosphate -citric acid buffer. When the  $\text{pH} \geq 8.0$  or  $\text{pH} \leq 3.4$ , the free CA-AuNPs themselves aggregated easily.

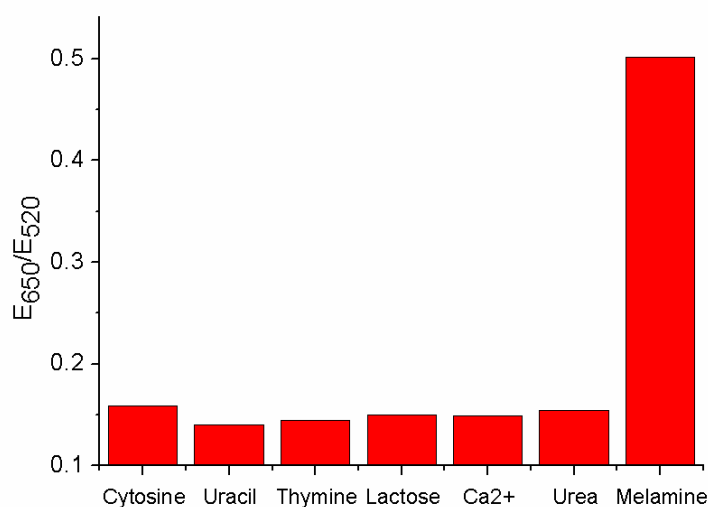

**Figure S3. UV-vis spectra ratio of E650/E520 in the presence of cytosine, uracil, thymine, lactose, urea, Ca<sup>2+</sup> and melamine. Concentration: 10  $\mu$ M each.**

The selectivity of this method for melamine was evaluated the ratio of E650/E520 in the presence of cytosine, uracil, thymine, lactose, urea, Ca<sup>2+</sup> and melamine. The concentration of each interferent was 1.0  $\mu$ M. The results showed excellent selectivity for melamine which was comparable to other detection methods<sup>1-3</sup> for melamine based on AuNPs.

**Table S1 Results of the Determination of the Hg<sup>2+</sup> in Tap Water**

| Tap water | Added ( $\mu$ M) | Found ( $\mu$ M) | Recovery (%) | RSD% (n=3) |
|-----------|------------------|------------------|--------------|------------|
| T1        | 0.05             | 0.045            | 90.0         | 1.4        |
| T2        | 0.10             | 0.953            | 95.3         | 1.5        |
| T3        | 1.50             | 1.456            | 97.0         | 2.1        |
| T4        | 2.50             | 2.417            | 96.7         | 1.7        |

**Table S2 Results of the Determination of the Melamine in Milk Powder**

| Milk powder | Added( $\mu\text{M}$ ) | Found ( $\mu\text{M}$ ) | Recovery (%) | RSD% (n=3) |
|-------------|------------------------|-------------------------|--------------|------------|
| M1          | 0.08                   | 0.772                   | 96.5         | 2.1        |
| M2          | 0.16                   | 0.157                   | 98.1         | 2.6        |
| M3          | 0.64                   | 0.658                   | 102.8        | 1.7        |
| M4          | 1.60                   | 1.776                   | 111.0        | 2.5        |

### Reference

1. L. Guo, J. Zhong, J. Wu, F. Fu, G. Chen, Y. Chen, X. Zheng and S. Lin, *Analyst*, 2011, **136**, 1659-1663.
2. H. Chi, B. Liu, G. Guan, Z. Zhang and M.-Y. Han, *Analyst*, 2010, **135**, 1070-1075.
3. X. Liang, H. Wei, Z. Cui, J. Deng, Z. Zhang, X. You and X.-E. Zhang, *Analyst*, 2011, **136**, 179-183.
